# Supplementary material
Source: Springer Nature journal article supplement (https://www.springermedizin.de/resource/supplementary/13058_2010_9509_MOESM7_ESM.pdf/9702290)

**A**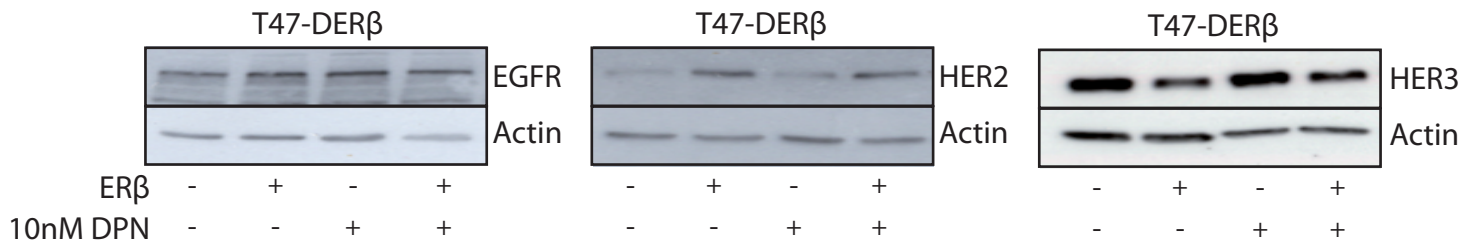**B**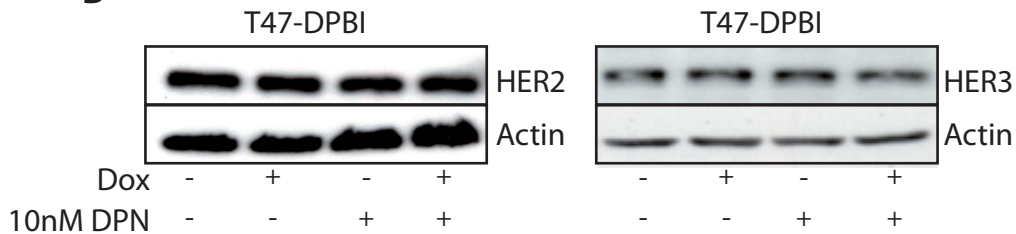**C**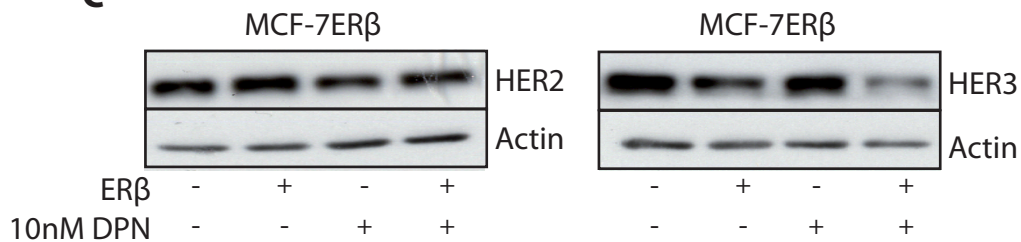**D**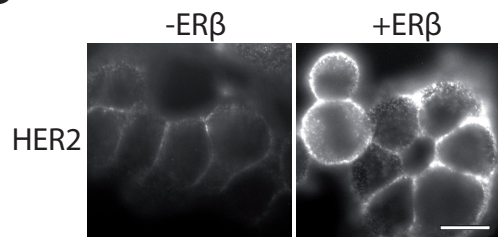

Supplement: MOESM7 [file 9702290]
